**1 *Wolbachia* successfully replicate in a newly established horn fly, *Haematobia*  
2 *irritans irritans* (L.) (Diptera: Muscidae) cell line**

**3**

**4 Short running Title:** Transinfection of horn fly cell line with *Wolbachia*

**5**

**6 Mukund Madhav<sup>a</sup>, Geoff Brown<sup>b</sup>, Jess A.T. Morgan<sup>b</sup>, Sassan Asgari<sup>c</sup>, Elizabeth A.**

**7 McGraw<sup>d</sup>, Ulrike G. Munderloh<sup>e</sup>, Timothy J. Kurtti<sup>e</sup>, Peter James<sup>a\*</sup>.**

**8**

**9 <sup>a</sup>Queensland Alliance for Agriculture and Food Innovation (QAAFI), The University of**

**10 Queensland, Brisbane, QLD 4072, Australia.**

**11 <sup>b</sup>Department of Agriculture and Fisheries, Brisbane, Australia.**

**12 <sup>c</sup>Australian Infectious Disease Research Centre, School of Biological Sciences, The**

**13 University of Queensland, Brisbane, QLD 4072, Australia.**

**14 <sup>d</sup>Department of Entomology, Center for Infectious Disease Dynamics, Pennsylvania**

**15 State University, University Park, PA 16802, USA.**

**16 <sup>e</sup>Department of Entomology, University of Minnesota, USA.**

**17**

**18**

**19 \*Corresponding Author: Peter James; Tel: +61734432468; p.james1@uq.edu.au**

**20**

**21**

**22**

**23**

## 24 **Abstract**

25 BACKGROUND: *Haematobia spp.*, horn flies (HF) and buffalo flies (BF), are  
26 economically important ectoparasites of dairy and beef cattle. Control of these flies  
27 relies mainly on the treatment of cattle with chemical insecticides. However, the  
28 development of resistance to commonly used compounds is compromising the  
29 effectiveness of these treatments and alternative methods of control are required.  
30 *Wolbachia* are maternally transmitted endosymbiotic bacteria of arthropods that  
31 cause various reproductive distortions and fitness effects, making them a potential  
32 candidate for use in the biological control of pests.

33 RESULTS: Here we report the successful establishment of a continuous HF cell line  
34 (HIE-18) from embryonic cells and its stable transinfection with *Wolbachia* strain  
35 wAlbB native to mosquitoes, and wMel and wMelPop native to *Drosophila*  
36 *melanogaster*. The established HIE-18 cells are typically round and diploid with ten  
37 chromosomes ( $2n = 10$ ) or tetraploid with 20 chromosomes ( $4n=20$ ) having a  
38 doubling time of 67.2 hours. *Wolbachia* density decreased significantly in the HIE-18  
39 cells in the first 48 hours of infection, possibly due to overexpression of antimicrobial  
40 peptides through the Imd immune signalling pathway. However, density recovered  
41 after this time and stably *Wolbachia*-infected HIE-18 cell lines have now all been  
42 subcultured more than 50 times as persistently infected lines.

43 CONCLUSION: The amenability of HF to infection with different strains of *Wolbachia*  
44 suggests the potential for use of *Wolbachia* in novel approaches for the control of  
45 *Haematobia spp.* Further, the availability of the HIE-18 cell line will provide an  
46 important resource for the study of genetics, host-parasite interactions and chemical  
47 resistance in *Haematobia* populations.

**48** **Keywords:** *Wolbachia*, biocontrol, horn fly, *Haematobia* spp., biopesticide, pest

**49** management, veterinary ectoparasite

**50**

**51**

**52**

**53**

**54**

**55**

**56**

**57**

**58**

**59**

**60**

**61**

**62**

**63**

**64**

**65**

**66**

**67**

**68 Headings:**

**69** 1. INTRODUCTION

**70** 2. MATERIALS AND METHODS

**71** 2.1. Establishment of HF primary cell culture and young cell lines

**72** 2.2. Maintenance of *Haematobia irritans* embryonic (HIE) line HIE18

**73** 2.3. Other cell lines

**74** 2.4. Molecular identification of HIE-18 cells

**75** 2.5. Karyotyping

**76** 2.6. Identification of optimal culturing temperature and media for HIE-18 cells

**77** 2.7. Transfecting HIE-18 cells with *Wolbachia*

**78** 2.8. Detection and quantification of *Wolbachia* in HIE-18 cells

**79** 2.9. Effect of *Wolbachia* on population doubling time

**80** 2.10. Upregulation of immune response genes in *Haematobia* cells

**81** 3. RESULTS

**82** 3.1. Features of HIE-18 cells isolated from HF embryos

**83** 3.2. Species confirmation using PCR and chromosomal analysis

**84** 3.3. Identification of optimal culturing temperature and media for HIE-18 cells

**85** 3.4. *Wolbachia* replication in HIE-18 cell lines

**86** 3.5. Effect of *Wolbachia* infection on the population doubling time of HIE-18 cells

**87** 3.6. Effect of culture media and temperature on *Wolbachia* growth in HIE-18 cells

**88** 3.7. Innate immune response of HIE-18 cell line against *Wolbachia*

**89** 4. DISCUSSION

**90** 5. CONCLUSION

**91**

**92**

**93**

## **94 1. INTRODUCTION**

**95** *Wolbachia* are maternally inherited endosymbionts of arthropods and filarial  
**96** nematodes <sup>1</sup>. They are estimated to infect nearly 40% of terrestrial arthropod species  
**97** <sup>2</sup>. The nature of *Wolbachia*-host associations varies from parasitic to mutualistic,  
**98** often depending on the length of the association <sup>3, 4</sup>. In longstanding associations,  
**99** any deleterious effects of *Wolbachia* tend to become attenuated, and *Wolbachia* may  
**100** eventually form a mutualistic relationship with its host <sup>1</sup>. Some examples of beneficial  
**101** effects in such associations are in facilitating parasitoid wasp (*Asobara tabida*)  
**102** oocyte maturation, female development in adzuki bean borer (*Ostrinia scapulalis*)  
**103** and the supplementation of vitamin B in bedbugs <sup>1, 5-7</sup>. The most commonly noted  
**104** parasitic effects are where *Wolbachia* manipulate the reproductive biology of their  
**105** hosts to facilitate spread through populations by mechanisms such as cytoplasmic  
**106** incompatibility (CI), male-killing, feminisation of males and parthenogenesis <sup>8</sup>.  
**107** *Wolbachia* may also mediate a range of other effects in their hosts such as the  
**108** reduction of pathogen transmission, changes in feeding behaviour and locomotion,  
**109** decrease in offspring survival and reductions in longevity, which can potentially be  
**110** utilised in the design of programs for the control of arthropods, filarial nematodes and  
**111** arthropod vectored diseases <sup>4, 9-13</sup>.  
**112** Different *Wolbachia*-host genomic studies have revealed natural horizontal transfer  
**113** of *Wolbachia* between invertebrate hosts during their evolutionary history <sup>9, 14</sup>. The  
**114** mechanism behind horizontal transfer needs to be further explored, but some  
**115** proposed mechanisms include co-feeding/ salivary exchange, parasitoid wasp or  
**116** mite co-infection, and faecal-oral transmission <sup>9, 15-18</sup>. Judging from comparisons of  
**117** phylogenetic associations, natural horizontal transmission of *Wolbachia* must have  
**118** occurred relatively frequently in past evolutionary history <sup>9</sup>. However artificial

**119** transinfection is usually more complicated and some species such as red flour beetle  
**120** *Tribolium castaneum*, silkworm (*Bombyx mori*) and the mosquito *Anopheles*  
**121** *gambiae*, appear relatively resistant to *Wolbachia* infection. Despite many attempts it  
**122** has not yet been possible to develop sustainably transinfected strains of these  
**123** insects [4]. Also, newly transinfected hosts tend to have a lower infection frequency  
**124** than in natural associations and often exhibit unstable maternal inheritance<sup>19-22</sup>. To  
**125** overcome these difficulties and facilitate the success of cross-species infection, prior  
**126** adaption of *Wolbachia* to the target host-context by culturing in a cell line from the  
**127** target host species has been suggested<sup>9, 21</sup>. For instance, the adaption of wMelPop  
**128** *Wolbachia* (isolated from *Drosophila melanogaster*) in *Aedes aegypti* cells aided the  
**129** development of a *Wolbachia* infected *Ae. aegypti* mosquito line<sup>21</sup>. When the  
**130** mosquito-adapted *Wolbachia* were reintroduced to *Drosophila*, they showed lower  
**131** virulence, and lower infection frequency in comparison to *Drosophila*-maintained  
**132** wMelPop<sup>21</sup>. A recent genomic comparison between wMelPop grown in *D.*  
**133** *melanogaster* cells, a wMelPop adapted in mosquito cells (wMelPop-CLA) for 3.5  
**134** years, and wMelPop from *Wolbachia*-infected *Ae. aegypti* mosquitoes (wMelPop-  
**135** PGYP) four years after transinfection, showed genomic differences between  
**136** wMelPop, and wMelPop-CLA but no difference in wMelPop-PGYP, further indicating  
**137** that cell line culture can be an excellent medium for quick adaptation of *Wolbachia* to  
**138** a new host-context<sup>23</sup>. An additional benefit of culturing *Wolbachia* in cell lines is the  
**139** ready availability of significant amounts of *Wolbachia* for use in transinfection studies  
**140** <sup>4</sup>.

**141** Insects live in diverse ecological niches where they interact with many different  
**142** species of microorganisms, yet they successfully evade infections because of strong  
**143** innate immune responses<sup>24</sup>. Four major pathways (Bacteria: Toll, and Imd; viruses:

**144** JAK/STAT and RNAi) are associated with the innate immune system of insects,  
**145** which is responsible for defense against pathogens<sup>19, 24-27</sup>. Usually, a Toll signalling  
**146** cascade is induced by Gram-positive bacteria and fungi, whereas the immune  
**147** deficiency (Imd) pathway is induced by Gram-negative bacteria<sup>26, 27</sup>. These  
**148** signalling cascades increase the production of antimicrobial peptides (AMPs) to  
**149** suppress or eliminate the infection<sup>24</sup>.

**150** As the Toll and Imd pathways target bacteria, they can also affect *Wolbachia* density  
**151** in newly infected hosts<sup>19</sup>. *Wolbachia*-host interactions are quite variable, and  
**152** immune genes from Toll (*Cactus*, *Dorsal*, *MyD88*), Imd (*Caspar*, *Relish*, *dFADD*,  
**153** *IMD*) and AMPs (*Attacin*, *Cecropin*, *Defensin*) are differentially expressed in different  
**154** hosts<sup>19, 28-32</sup>. For instance, researchers have found no effect on the innate immune  
**155** response with the presence or absence of *Wolbachia* in the native host mosquitoes,  
**156** *Aedes albopictus* and *Aedes fluviatilis*<sup>19, 28, 33</sup>. However, innate immune genes were  
**157** overexpressed when *Ae. albopictus* mosquito cells (Aa23) were infected with *wMel*  
**158** *Wolbachia*, sand fly cell lines (LL-5) with *wMel* or *wMelPop-CLA* *Wolbachia*, and *An.*  
**159** *gambiae* cell lines with *wAlbB* *Wolbachia*<sup>19, 34</sup>.

**160** To date, most of these studies have been done in a mosquito or *Drosophila* species  
**161** context. However, different insect species exhibit different responses to *Wolbachia*  
**162**<sup>19</sup>. Clarifying the nature of these interactions in *Haematobia* cells may assist the  
**163** ultimate development of transinfected strains of *Haematobia* and the design of  
**164** *Wolbachia*-based *Haematobia* control programs.

**165** Horn flies (*Haematobia irritans irritans*) (HF) and buffalo flies (*Haematobia irritans*  
**166** *exigua*) (BF) are closely related obligate hematophagous cattle ectoparasites  
**167** causing substantial economic losses across the world<sup>35</sup>. Both species have proven

**168** to be highly invasive and they have often been classified as subspecies<sup>35</sup>. It is hard  
**169** to morphologically discriminate between them, whereas at the molecular level,  
**170** ribosomal genes are conserved, and mitochondrial genes have a relatively low  
**171** divergence of 1.8-1.9%<sup>36</sup>. The estimated loss associated with the HF alone to North  
**172** and South America is close to \$US3.56B per annum<sup>35, 37, 38</sup>. Both HF and BF have  
**173** developed resistance to commonly used chemical insecticides and new methods are  
**174** required to reduce reliance on chemical controls in endemic areas and to prevent  
**175** invasion into new areas<sup>35, 39, 40</sup>.

**176** Here we report the establishment of a HF embryonic cell line (HIE-18) isolated to  
**177** adapt *Wolbachia* to the *Haematobia* context before BF transinfection. We evaluated  
**178** the ability of HIE-18 to support growth and development of *wMel* and *wMelPop*  
**179** *Wolbachia* isolated from *D. melanogaster* cells, and *wAlbB* *Wolbachia* from mosquito  
**180** (*Ae. albopictus*) cells. Further, we analysed the host immune response by  
**181** investigating expression of genes from the Toll and Imd pathways and AMPs to  
**182** understand the early interactions between *Wolbachia* and the new host HIE-18 cells.

## **183 2. MATERIALS AND METHODS**

### **184 2.1. Establishment of HF primary cell culture and young cell lines**

**185** Embryonated HF eggs were obtained from a laboratory colony reared in the  
**186** presence of antibiotics and maintained at the USDA/ARS lab in Kerrville, TX, USA<sup>41</sup>.  
**187** Eggs were sent to the University of Minnesota and processed following the protocol  
**188** described in Goblirsch et al. (2013) used for the successful establishment of an  
**189** embryonic cell line from *Apis mellifera*<sup>42</sup>. Briefly, HF eggs were surface disinfected  
**190** by sequentially rinsing in a 0.5% sodium hypochlorite and Tween 80 mix, 0.5 %  
**191** benzalkonium chloride, 70% ethanol and several times in sterile water to remove  
**192** residual chemicals. The eggs were finally rinsed three times with modified Leibovitz



**193** L-15 cell culture medium <sup>43</sup> (hereafter referred to as L15C) and gently crushed with a  
**194** pestle (Kimble Chase, Vineland, NJ) in 1.5 ml sterile Eppendorf tubes to release  
**195** internal embryonic tissue <sup>44</sup>. The cellular homogenate was centrifuged at 100 x g for  
**196** 2 min to remove yolk particles and inoculated in 12.5 cm<sup>2</sup> non-ventilating screw cap  
**197** culturing flasks (Falcon, Corning Inc. Tewsbury, MA) in 2 mL of culture medium  
**198** supplemented with FBS (10%), tryptose phosphate broth (5%), lipoprotein  
**199** concentrate (0.1%; MP Biomedicals), antibiotics (100 µg/mL penicillin, 100 µg/mL  
**200** streptomycin, and 0.25 µg/mL amphotericin) (Life Technologies, Grand Island, NY).  
**201** Flasks were incubated in a non-humidified incubator at 32°C, and media were  
**202** changed weekly. Confluent primary cultures were dispersed by gentle pipetting and  
**203** one half of the suspension transferred to a new flask. Young lines (passage 10 or  
**204** less) were subcultured at a ratio of 1:2 every 2 - 4 weeks and maintained in 25 cm<sup>2</sup>  
**205** culture flasks (Cellstar; Greiner Bio-One, Monroe NC) at 32°C. Cell lines in passage  
**206** 2-5 were frozen by suspending cells in freezing media (L15C supplemented with  
**207** 20% FBS and 10% DMSO) at the rate of -1°C / min using CoolCell alcohol-free  
**208** freezing container (BioCision, LLC, Mill Valley, CA) and stored in liquid nitrogen.

## **209 2.2. Maintenance of *Haematobia irritans* embryonic (HIE) line HIE18**

**210** We selected the fastest growing line, HIE18, for continuation. At passage 20, when  
**211** the line could be split 1:5 every 3-4 weeks, the cells were adapted to Schneider's  
**212** medium by gradually increasing the proportion of Schneider's medium to L15C from  
**213** 20% to 100% in 20% intervals. Since passage 20, the HIE-18 line has been  
**214** maintained at 28°C in Schneider's medium supplemented with 10% FBS.

### **215 2.3. Other cell lines**

**216** *Ae. aegypti* mosquito cell lines (Aag2) infected with *wMel* and *wMelPop*, provided by  
**217** the Eliminate Dengue laboratory at Monash University, Australia, and the *Ae.*  
**218** *albopictus* mosquito cell line (Aa23T) infected with the *wAlbB Wolbachia* strain were  
**219** cultured in 75 cm<sup>2</sup> culturing flask with 12 ml of Mitsuhashi and Maramorosch medium  
**220** (M&M) (Sigma Aldrich, NSW, Australia) and Schneider's medium (Sigma Aldrich,  
**221** NSW, Australia) mixed in a ratio of 1:1 at 26°C. The medium was supplemented with  
**222** 10% fetal bovine serum (Gibco, MD, USA). All cell lines were subcultured once every  
**223** 6-7 days, and no antibiotics were used during culturing.

### **224 2.4. Molecular identification of HIE-18 cells**

**225** DNA was isolated from whole adult BF and HIE-18 cells using an Isolate II Genomic  
**226** DNA kit (Bioline, NSW, Australia) following the manufacturer's protocol. Forward  
**227** primer HCOI\_F 5'- TGAATTAGGACATCCTGGAGCTT-3' and reverse primer  
**228** HCOI\_R 5'-CACCAGTTAATCCTCCAACCTG-3' were used to target the mitochondrial  
**229** COI gene of the *Haematobia* species<sup>45</sup>. Each PCR tube contained 1.5 µl DNA, 1µm  
**230** of each primer, 1µl of 10x PCR buffer (Qiagen, Melbourne, Australia), 1mM dNTP,  
**231** 0.1 µl Taq DNA polymerase (Qiagen, Melbourne, Australia) and nuclease-free water  
**232** to make a total volume of 10 µl. Thermocycling conditions for the reactions were as  
**233** follows: an initial incubation at 94°C for 3 min, followed by 35 cycles of denaturation  
**234** at 94°C for 30 sec, annealing at 50°C for 30 sec, and elongation at 72°C for 45 sec  
**235** with a final extension at 72°C for 10 min. PCR product was amplified in a DNA  
**236** Engine Thermal Cycler (Bio-Rad, Sydney, Australia) and electrophoresed on a 1%  
**237** agarose gel. The DNA band was visualised by staining with GelRed (Biotium, NSW,  
**238** Australia).

## **239 2.5. Karyotyping**

**240** Cell lines in log phase growth were incubated in fresh modified Leibovitz's L-15  
**241** medium containing 12.5  $\mu\text{M}$  colchicine overnight at 32°C. After 12 hours the cells  
**242** were pelleted at 300 x g for 10 min, resuspended in hypotonic KCl (75mM), and  
**243** further incubated for 60 min at 34°C. Post incubation HIE-18 cells were fixed in a  
**244** mixture of methanol and acetic acid (3:1) for 30 min at room temperature. HIE-18  
**245** cells were then pelleted and resuspended in fresh fixative. A droplet containing the  
**246** resuspended cells was placed on a pre-chilled (-20°C) slide to air dry, and stained  
**247** with 3.2 % Giemsa stain prepared in Sørensen's buffer (pH=6.8) for an hour at 34°C  
**248** <sup>42</sup>. Metaphase chromosomes were counted under an Eclipse E400 phase-contrast  
**249** microscope (Nikon, NY, USA).

## **250 2.6. Identification of optimal culturing temperature and media for HIE-18 cells**

**251** HIE-18 cells were seeded into 25 cm<sup>2</sup> flasks with 3.5 ml L-15C at a cell density of  
**252** approximately 1.1 x 10<sup>6</sup> cells/ml. Flasks were incubated at 30°C overnight to  
**253** establish a baseline cell density as a control. The next day flasks were randomly  
**254** assigned to test temperatures 26-32°C and incubated for six days. On day seven,  
**255** cells were dislodged by gentle pipetting, pelleted by centrifugation at 300 x g, and  
**256** incubated in 0.5 ml of NaOH (0.5 N) overnight at 27°C to solubilise cellular protein.  
**257** The solubilised protein (10  $\mu\text{l}$ ) was mixed with 290  $\mu\text{l}$  of Quick Bradford reagent  
**258** (Sigma Aldrich, NSW, Australia) and incubated at room temperature for 5 min <sup>42</sup>.  
**259** Optical density readings for samples were taken at 595 nm using a BMG LABTECH  
**260** microplate reader (BMG LABTECH, Ortenberg, Germany). Bovine serum albumin  
**261** (Sigma-Aldrich, NSW, Australia) stock (10mg/ml) in Milli-Q water was used to  
**262** prepare a protein standard curve. All the experiments were carried out in triplicate.

**263** Similar to the above assay, HIE-18 cells were inoculated into 25 cm<sup>2</sup> flasks at a  
**264** density of 0.8 x10<sup>6</sup> cells/ml and incubated overnight to assign a baseline value. The  
**265** next morning medium from each flask was replaced with one of the test media  
**266** [modified Leibovitz's L-15 (Sigma Aldrich, NSW, Australia), Schneider's (Sigma  
**267** Aldrich, NSW, Australia), 1:1 mix of Leibovitz's and Schneider's, and Shield's (Sigma  
**268** Aldrich, NSW, Australia)], and cells were left to grow for five days. Protein estimation  
**269** was carried out according to the previously described protocol.

## **270 2.7. Transfecting HIE-18 cells with *Wolbachia***

**271** HIE-18 cell transinfection was carried out using the protocol described by Herbert et  
**272** al. (2017) <sup>19</sup>. Briefly, wAlbB, wMel, and wMelPop infected mosquito cell lines were  
**273** grown in 75 cm<sup>2</sup> flasks, each containing 15 ml of M&M media (Sigma Aldrich, NSW,  
**274** Australia) having 10% FBS. Cells were dislodged from the flask after seven days by  
**275** vigorous pipetting and spun at 2000 x g. The resulting pellet was washed three times  
**276** with 5 ml SPG buffer (218 mM sucrose, 3.8 mM KH<sub>2</sub>PO<sub>4</sub>, 7.2 mM MK<sub>2</sub>HPO<sub>4</sub>, 4.9 mM  
**277** L-glutamate, pH 7.5), and sonicated on ice at 24% power using a Q125 sonicator  
**278** (Qsonica, CT, USA). Cellular debris was pelleted by spinning at 1000 x g for 10 min  
**279** at 4°C, and the supernatant was filtered through 50 µm and 2.7 µm acrodisc syringe  
**280** filters (Sigma Aldrich, NSW, Australia). The filtered supernatant was centrifuged at  
**281** 12000 x g, and the *Wolbachia* pellet was resuspended in 100 µl of SPG buffer. The  
**282** pellet suspension was immediately added drop by drop into the cell line flasks when  
**283** the HIE-18 cells were 80% confluent. The infected cell lines were cultured for 5-6  
**284** days and then split in a ratio of 1:2 into the new flasks.

## **285 2.8. Detection and quantification of *Wolbachia* in HIE-18 cells**

**286** DNA was isolated from cells using the Isolate II Genomic DNA kit (Bioline, NSW,  
**287** Australia) following the manufacturer's protocol. Detection of *Wolbachia* was carried  
**288** out by real-time PCR on a Rotor-Gene Q machine (Qiagen, Australia) using strain-  
**289** specific primers and probes. Primers for *wAlbB* amplified the *wsp* gene (forward  
**290** primer: 5'- GGT TTT GCT GGT CAA GTA-3', reverse primer: 5'-  
**291** GCT GTA AAGA ACG TTG ATC-3', probe: 5'- FAM-TGTTAGTTATGATGT  
**292** AACTCCAGAA-TAMRA-3')<sup>46</sup>, whereas the primers used for *wMel* amplified the  
**293** *WD0513* gene (forward primer: 5'- CAA ATT GCT CTT GTC CTG TGG-3', reverse  
**294** primer: 5'- GGG TGT TAA GCA GAG TTACGG-3', probe: 5'-  
**295** CyTGAAATGGAAAATTGGCGAGGTGTAGG-BHQ-3') and the primers for  
**296** *wMelPop* targeted the IS5 element in *WD1310* gene (forward primer: 5'-CTC ATC  
**297** TTT ACC CCG TAC TAA AAT TTC-3', reverse primer: 5'-TCT TCC TCA TTA AGA  
**298** ACC TCT ATC TTG-3', probe: 5'- Joe-TAG CCT TTT ACT TGT TTC CGG ACA  
**299** ACCT-TAMRA -3')<sup>47</sup>. The total volume of each reaction mix was 10 µl, containing 5  
**300** µl of the PrimeTime ® Gene Expression Master Mix (IDT, NSW, Australia), 0.5 µl  
**301** each of 10 µM forward and reverse primer, 0.25 µl of 5 µM probe and 3 µl of  
**302** genomic DNA. The optimised amplification conditions for *wMel* and *wMelPop* were 3  
**303** min at 95°C followed by 45 cycles of 10 s at 95°C, 15 s at 51°C, and 15 s at 68°C,  
**304** whereas for *wAlbB*, amplification was done for 3 min at 95°C followed by 45 cycles  
**305** of 20 s at 94°C, 20 s at 50°C, and 30 s at 60°C.

**306** For relative quantification of the *Wolbachia* single-copy *wsp* gene (forward primer: 5-  
**307** 'TGG TCC AAT AAG TGA TGA AGA AAC-3', reverse primer: 5'- AAA AAT TAA  
**308** ACG CTA CTC CA-3') and the host *GAPDH* gene (forward primer: 5'-378\_F\_CCG  
**309** GTG GAG GCA GGAATGATGT-3', reverse primer: 5'- 445\_R

**310** CCACCCAAAAGACCGTTGACG-3') were amplified <sup>33</sup>. Each sample was run in  
**311** triplicate on a Rotor-gene Q Instrument (Qiagen, Australia) with total reaction volume  
**312** of 10 µl containing 5 µl Rotor-Gene SYBR<sup>®</sup> Green PCR Kit (Bioline, Australia), 0.3 µl  
**313** each of 10 µM forward and reverse primer and 2 µl of genomic DNA. Negative and  
**314** positive controls were run with all samples. The optimised thermocycling conditions  
**315** were initial incubation for 5 min at 95°C followed by 45 cycles of 10 s at 95°C, 15 s at  
**316** 55°C, and 15 s at 69°C, acquiring green at the end of the step. The relative density  
**317** of *Wolbachia* was calculated using the delta-delta CT method <sup>48</sup>.

### **318** 2.9. Effect of *Wolbachia* on population doubling time

**319** *Haematobia* cells infected with *wAlbB* (*wAlbB*-HIE-18), *wMel* (*wMel*-HIE-18),  
**320** *wMelPop* (*wMelPop*-HIE-18) and non-infected cells (HIE-18) were dislodged by  
**321** pipetting and seeded at a density of  $1.5 \times 10^6$  cells/mL into three different 25 cm<sup>2</sup>  
**322** culture flasks. The flasks were incubated at 28°C in Schneider's medium (Gibco Life  
**323** Technologies, Australia) supplemented with 10% FBS. The media were changed  
**324** every seven days. Cells were visualised under a Motic AE 30 inverted microscope  
**325** at 40X magnification with a Nikon model DS-L3 camera. A grid (2 cm X 2 cm) was  
**326** set up on the camera screen (Nikon, Sydney, Australia) for cell counting. Ten  
**327** randomly selected fields were counted for each flask at 24 h intervals from seeding  
**328** until they reached confluence >80% <sup>42</sup>. The experiment was replicated three times,  
**329** and data for cell density was plotted as the number of cells per cm<sup>2</sup> ( $\pm$  SD) per day.

### **330** 2.10. Upregulation of immune response genes in *Haematobia* cells

**331** HIE-18 cells were sampled without infection and then at 12, 24, 36 and 48 h post-  
**332** infection with *wAlbB*, *wMel*, and *wMelPop*. Total RNA extraction was performed  
**333** using the Isolate II RNA Mini Kit (Bioline, NSW, Australia) following the

**334** manufacturer's protocol. Primers were designed as detailed below to target the *H.*  
**335** *irritans* innate immune genes *cactus*, *relish*, *attacin*, *cecropin*, and *defensin*.  
**336** Targeted gene sequences of *D. melanogaster* were collected from the Flybase web  
**337** server (<https://flybase.org/>) and searched on the NCBI database to find similar  
**338** sequences in *Musca domestica*, the closest species to *Haematobia* for which gene  
**339** sequences were available. Gene sequences from *M. domestica* were searched for  
**340** sequence similarity in the recently sequenced *H. irritans* genome (Accession  
**341** number: GCA\_003123925.1) to find similar contigs. Finally, primers were designed  
**342** based on those contigs using Genious Prime software (See Table 1). A SensiFAST  
**343** Probe No-ROX One-Step Kit (Bioline, NSW, Australia) was used to carry out the  
**344** gene expression study following the manufacture's protocol with a Rotor-gene Q  
**345** Instrument (Qiagen, Australia). Melt curve analyses were performed in the range 55–  
**346** 90°C to examine reaction specificity of the designed primers. All of the assays were  
**347** performed in triplicate. Gene expression was normalised to the host *GAPDH* gene,  
**348** and change in expression level was calculated using the delta-delta CT method<sup>48</sup>.

### **349** 3. RESULTS

#### **350** 3.1. Features of HIE-18 cells isolated from HF embryos

**351** Twenty-two primary cultures were made to initiate primary cell lines from HF eggs. In  
**352** some instances, a slight variation was made to cell establishment protocols, either  
**353** by changing the seeding quantity of the inoculant (50 - 200 embryos) or centrifuging  
**354** cellular homogenate to remove the excess of yolk material. We expected that having  
**355** more cells from embryos would help in increasing cell-cell interaction, and extra yolk  
**356** material would provide the necessary nutritional support for cellular growth.  
**357** However, an excess of yolk material was found to interfere with cellular adherence in  
**358** the flasks. One culture of HIE-18 cells from HF embryos grew in aggregates of 20-30

**359** cells where cellular morphology was hard to discriminate in the first two-three weeks  
**360** (Fig. 1A). Nevertheless, within eight weeks cells reached confluence and a distinct  
**361** morphologically heterogeneous population of round epitheliocytes, neuronal-, and  
**362** fibroblast-like cells were seen. Later, round cells (5-10  $\mu\text{m}$ ) became predominant.  
**363** These were isolated and cryopreserved (Fig. 1B). Currently, HIE-18 cells have been  
**364** successfully passaged over 200 times (Fig. 1C). Ten of the remaining 22 primary  
**365** cultures developed into lines (passage 7 or less) and are currently stored in liquid  
**366** nitrogen.

### **367 3.2. Species confirmation using PCR and chromosomal analysis**

**368** HIE-18 cell identity was confirmed by amplifying the *COI* gene of approximately 920  
**369** bp size with *Haematobia*-specific primers. Both the HIE-18 cells and positive control  
**370** BF were amplified (Fig. 2A). HIE-18 cells were comprised predominantly of round  
**371** diploid cells with ten mitotic chromosomes or tetraploid cells with 20 chromosomes  
**372** (Fig. 2B-C). Diploid cells had five pairs of chromosomes, two of which were sub-  
**373** metacentric and three metacentric. There were no heteromorphic (sex)  
**374** chromosomes.

### **375 3.3. Identification of optimal culturing temperature and media for HIE-18 cells**

**376** Protein concentration was used as a measure of growth of the newly established  
**377** HIE-18 cell line incubated at four different temperatures (26, 28, 30 and 32°C) (Fig.  
**378** 3A). There was a significant difference in cellular replication at different temperatures  
**379** (one-way ANOVA:  $F_{4,10} = 237.1$ ,  $p < 0.0001$ ). Highest protein concentration was seen  
**380** at 30°C (2.6+0.72 mg), followed by 28°C (2.33+0.79 mg) indicating the best growth  
**381** at these two temperatures. There was also a significant difference in the  
**382** concentration of protein in different culturing media (one-way ANOVA:  $F_{4,10} = 118.3$ ,



**383**  $p < 0.0001$ ) (Fig. 3B) with the HIE-18 cells growing best in Schneider's medium (2.74  
**384** + 0.11 mg) and 1:1 mix of Schneider's and L-15 culture media (2.49 + 0.13 mg).

### **385** 3.4. *Wolbachia* replication in HIE-18 cell lines

**386** It took multiple rounds of *Wolbachia* introduction into the HIE-18 cell lines to  
**387** establish persistent infections of *wAlbB* (two rounds), *wMel* (three rounds) and  
**388** *wMelPop* (two rounds). We saw a significant decrease in the density of *Wolbachia*  
**389** within 48 hours of infection: *wAlbB* (one-way ANOVA:  $F_{3,8} = 10.87$ ,  $p = 0.0034$ ), *wMel*  
**390** (one-way ANOVA:  $F_{3,8} = 27.30$ ,  $p = 0.0001$ ), and *wMelPop* (one-way ANOVA:  $F_{3,8} =$   
**391**  $56.34$ ,  $p < 0.0001$ ; Fig. 4A-C). To date, HIE-18 cells infected with *wAlbB*, *wMel*, and  
**392** *wMelPop* have been successfully maintained for 70, 60 and 50 passages,  
**393** respectively, with stable infection and no significant change in *Wolbachia* density  
**394** over these passages (Fig. 4D-F). Interestingly, *wAlbB* appeared to grow at lower  
**395** density than the other two strains, *wMel* and *wMelPop*, in HIE-18 cells (Fig. 4A-F).

### **396** 3.5. Effect of *Wolbachia* infection on the population doubling time of HIE-18 **397** cells

**398** Population doubling time was calculated after stably infecting HIE-18 with *wAlbB*,  
**399** *wMel*, and *wMelPop* strains. The population doubling time for the uninfected HIE-18  
**400** cells was approximately 67.0 hours and the slope of the cell number by timeline plot  
**401** consequently higher than the infected lines ( $y = 7.2032x + 12.088$ ;  $r^2 = 0.998$ ) (Fig.  
**402** 5). For the *wMel*-HIE-18 (77.0 hours) and *wAlbB*-HIE-18 (79.2 hours) doubling time  
**403** was longer and the slope of the population growth lines consequently not as steep  
**404** ( $6.479x + 11.716$ ;  $r^2 = 0.997$ ;  $5.7843x + 11.756$ ,  $r^2 = 0.994$ ). The *wMelPop*-HIE-18  
**405** grew more slowly than the others with a doubling time of approximately 86.4 hours ( $y$   
**406**  $= 4.363x + 13.036$ ;  $r^2 = 0.992$ ). The newly introduced *Wolbachia* infections appear to

**407** exert varying levels of stress on the new host cells, increasing their doubling time  
**408** and this effect was most marked in the case of the *wMelPop* infection.

**409** **3.6. Effect of culture media and temperature on *Wolbachia* growth in HIE-18**  
**410** **cells**

**411** *Wolbachia* infected HIE-18 cells in three different standard media (Schneider's  
**412** medium, Leibovitz's L-15 medium, and Shield's medium) and a mixture of Leibovitz's  
**413** L-15 and Schneider's media (1:1) were grown for *Wolbachia* quantification after  
**414** seven days of incubation. There was a significant effect of the Schneider's medium  
**415** on *wAlbB* strain density (Tukey test:  $p=0.02$ ) and Schneider's (Tukey test:  $p=0.01$ )  
**416** and 1:1 mix of Schneider's and L-15 media (Tukey test:  $p=0.03$ ) on *wMelPop* density  
**417** (Fig. 6) when compared to baseline. However, no effect of the media was seen on  
**418** *wMel* density.

**419** Infected cells were grown at four different temperatures (26, 28, 30, and 32°C) and  
**420** *Wolbachia* was quantified using a similar protocol to that described above (Fig. 7).  
**421** Overall, seven days of incubation at assigned temperatures resulted in significant  
**422** differences between temperatures in *Wolbachia* density of *wAlbB*-HIE-18 (one-way  
**423** ANOVA:  $F_{4,10}=22.97$ ,  $p<0.0001$ ), *wMel*-HIE-18 (one-way ANOVA:  $F_{4,10}=27.24$ ,  
**424**  $p<0.0001$ ), and *wMelPop*-HIE-18 (one-way ANOVA:  $F_{4,10}=39.99$ ,  $p<0.0001$ ).  
**425** However, there was a strain-specific response to temperature. In *wAlbB*-HIE-18  
**426** cells, *Wolbachia* density was highest at 28°C and decreased with increase in  
**427** temperature above this (Fig. 7A). *wMel* maintained highest density at 26°C (Fig. 7B),  
**428** whereas *wMelPop* density increased with the temperature, highest at 30°C, but  
**429** decreased at 32°C (Fig. 7C).

### **430 3.7. Innate immune response of HIE-18 cell line against *Wolbachia***

**431** Changes in *H. irritans* expression levels were investigated for the Imd (Immune  
**432** deficiency) pathway transcription factor Relish (Fig. 8A-C), Toll pathway repressor  
**433** Cactus (Fig. 8D-F), and three AMPs, Attacin, Cecropin, and Defensin (Fig. 8G-O)  
**434** within 48 hours of initial infection with *Wolbachia* to better understand the *H. irritans*  
**435** innate immune response towards the endosymbiont. There was a significant  
**436** increase in Relish expression within 12 hours for *wAlbB* (Tukey test:  $p=0.005$ ), *wMel*  
**437** (12 hours; Tukey test:  $p<0.0001$ ), and *wMelPop* (12 hours; Tukey test:  $p<0.0001$ ),  
**438** which remained overexpressed for *wMel* and *wMelPop* until 24 hours suggesting  
**439** activation of the Imd signalling cascade, followed by deactivation. Cactus was  
**440** significantly upregulated in comparison with the baseline at 12, 24 and 36 hours with  
**441** a maximum at 24 hours (Tukey test:  $p<0.0001$ ) but decreased after this time. AMPs  
**442** are effector molecules for immune response and in HIE-18 cells all three AMPs  
**443** tested were significantly upregulated within 36 hours of infection with few exceptions  
**444** at 12 hours (see Fig. 8I, L, N). Overall, expression of AMPs was highest at 24 hours  
**445** and decreased after this time.

### **446 4. DISCUSSION**

**447** Insect cell lines play a critical role in understanding vital biological processes and  
**448** insect-microbe interactions. Most mosquito cell lines were initiated with the intention  
**449** of studying mosquito-arboviruses interactions<sup>49</sup>. They have since been utilised in  
**450** studying molecular interactions between hosts and endosymbionts that are unable to  
**451** grow in the absence of host cells or tissues<sup>50-52</sup>. Here we report the establishment of  
**452** an *H. irritans* cell line (HIE-18) from embryos and studies of the interaction of HIE-18  
**453** cells with the endosymbiont *Wolbachia*.

**454** Donor tissue plays a critical role in establishing insect cell lines. In the past, many  
**455** attempts using specific adult tissues have resulted in limited success with relatively  
**456** few significant exceptions <sup>53</sup>. Currently, the use of whole embryonic and neonate  
**457** larvae as an inoculant is a common approach as cells directly derived from this  
**458** tissue often grow and proliferate better <sup>53</sup>. We tried three different tissue sources as  
**459** inoculum to initiate the primary cell line from HF: whole embryos (egg), neonate  
**460** larvae and pupae. A major challenge to the establishment of the *Haematobia* cell  
**461** culture from larvae and pupae was avoiding microbial contamination. Despite the  
**462** use of multiple different disinfection protocols, fresh cattle manure used to maintain  
**463** the source *Haematobia* colony was speculated to be a primary source of  
**464** contaminant for the cell lines <sup>54</sup>. In embryonic culture, one of the flasks HIE-18 with  
**465** heterotypic cellular morphologies resulted in better cellular interaction leading to the  
**466** successful establishment of a cell culture system. In the HIE-18 cell line, cell types  
**467** with an approximately circular morphology have become predominant.

**468** Frequently, primary cells have limited differentiation capabilities and undergo  
**469** senescence within a short period (40-50 generations for mammalian primary cells) <sup>42</sup>,  
**470** <sup>55</sup>. Sometimes, differentiation capabilities can be altered either naturally or through  
**471** mutation resulting in a continuously proliferating cell system <sup>42</sup>. The developed HIE-  
**472** 18 cell line has been subcultured through more than 200 passages, which equates to  
**473** more than 400 generations suggesting that the HIE-18 cells have formed a  
**474** continuous cell line. We have also thawed cryopreserved cells and in most instances  
**475** the thawed cells have been found to be mitotically active and viable, indicating that  
**476** HIE-18 cell line can be maintained for long term storage.

**477** Horn flies are karyotypically diverse <sup>56</sup>. Of three chromosomal investigations in HF  
**478** two sourced insects from the USDA Livestock Insect Research Laboratory, Kerrville

**479** TX, one from a wild population from Argentina and one from a population of HF from  
**480** Uruguay<sup>56</sup>. Horn flies from the USDA Lab colony had five pairs of chromosomes,  
**481** without a sex chromosome<sup>57, 58</sup>. However, the wild HF populations from Argentina  
**482** and Uruguay had an extra B-chromosome and the resultant karyotype of  $2n=11$  ( $2n$   
**483** =  $10+ B$ ) in nearly 50% of the tested flies<sup>56</sup>. Our cell line was established from  
**484** embryos sourced from the USDA laboratory HF colony and had a similar  
**485** chromosomal karyotype to that previously reported from the USDA flies<sup>58</sup>.

**486** Identification of appropriate media, and temperature for optimal cell growth, is a  
**487** critical step in the establishment of a cell line. Growth conditions for early cell lines  
**488** were usually determined by tedious experimentation and testing of different  
**489** permutations of media components and growth conditions<sup>53</sup>. The current preferred  
**490** approach is to first test different commercially available media<sup>59</sup>. Initially, the HIE-18  
**491** cell lines were established and cultured in modified Leibovitz's L-15 medium  
**492** designed for culturing a tick cell line by adding cholesterol, vitamins, glucose and  
**493** amino acids to the L-15 medium<sup>44</sup>. Based on our findings, we have recently moved  
**494** to using Schneider's medium for improved HIE-18 growth. Schneider's medium is  
**495** widely used for culturing *D. melanogaster* cell lines and differs in composition (mainly  
**496** inorganic salts, vitamins, amino acids and cholesterol) from modified L-15 medium  
**497**<sup>60</sup>. Mostly, insect cells are cultured between 25 and 30°C and have been found to  
**498** have reduced cell replications at lower temperatures<sup>61</sup>. However, as a result of the  
**499** study described here we are now maintaining the HIE-18 cells at 30°C for better  
**500** proliferation.

**501** Most available knowledge of insect cellular immune responses has been derived  
**502** from studies with either *Drosophila* or mosquito cells, but the immune response in  
**503** *Haematobia* species is less well understood. Cellular transinfection of insect cells

**504** with *Wolbachia* from different host backgrounds has shown mixed results in  
**505** mosquitoes, and other dipteran species<sup>19, 34, 49</sup>. It took a number of attempts to  
**506** stably infect HIE-18 cell lines with *Wolbachia* as density in the infected HIE-18 lines  
**507** decreased significantly in the first 48 hours after introduction. To better understand  
**508** the initial interaction between the HIE-18 cells and *Wolbachia*, several gene  
**509** expression studies were carried out with the Imd pathway transcription factor Relish,  
**510** Toll pathway repressor gene Cactus, and three AMPs, Attacin, Cecropin, and  
**511** Defensin. The immune gene expression study suggested that *wAlbB*, *wMel*,  
**512** *wMelPop* infections in the HIE-18 cell line activated the Imd pathway, resulting in the  
**513** production of AMPs and reduced survival of *Wolbachia* until the infection became  
**514** established in the HIE-18 lines. These results are consistent with the upregulation of  
**515** the *Relish*, *Attacin*, *Cecropin*, and *Defensin* genes seen within 72 hours of infection  
**516** of the LL-5 sand fly cell line with *wMel* and *wMelPop-CLA* *Wolbachia*, and *Cactus* in  
**517** the *Spodoptera frugiperda* Sf9 cell line infected with *wMel* *Wolbachia*<sup>19, 34</sup>. Despite  
**518** the initial upregulation of immune response genes, HIE-18 cell lines have become  
**519** stably infected with *wAlbB*, *wMel*, and *wMelPop* which suggests a level of  
**520** permissiveness of *Haematobia* species to *Wolbachia* or that *Wolbachia* is able to  
**521** suppress or overcome the initial *H. irritans* innate response.

**522** After the establishment of stable infections of *Wolbachia* in the HIE-18 cell line the  
**523** optimal medium and temperature to achieve maximum densities of *Wolbachia* were  
**524** determined. Microbial endosymbionts play an essential role in host metabolism by  
**525** nutrition provisioning, and vice versa<sup>62</sup>. Host nutrition and metabolism also influence  
**526** endosymbiont dynamics<sup>62</sup>. For example, supplementation with thiamine  
**527** monophosphate decreased endosymbiont *Sodalis* and *Wigglesworthia* density in  
**528** tsetse flies. Another similar example is supplementation of a *Drosophila* diet with

**529** sucrose which led to a higher density of *Wolbachia* in comparison to a yeast  
**530** enriched diet <sup>62-64</sup>. Temperature is another critical factor that can modulate host-  
**531** endosymbiont interactions as it directly affects the rate of biochemical reactions,  
**532** which can alter the performance and survival of organisms <sup>65</sup>. Most temperature  
**533** related studies have been done in either *Drosophila* or mosquito species and  
**534** reported effects on *Wolbachia* density inside hosts can be complex and quite  
**535** variable <sup>66-70</sup>. Very little is known about the influence of culture medium and  
**536** temperature in the context of different *Wolbachia* strain infected host cell lines.  
**537** Interestingly, culture medium did not have any effect on wMel density inside HIE-18  
**538** cells, but wAlbB and wMelPop had higher density in HIE-18 cells cultured in  
**539** Schneider's medium. *Wolbachia* strains differ in temperature preference as  
**540** previously seen with other insect species <sup>68, 70</sup>. This study has found that incubating  
**541** *Wolbachia*-infected cell lines at 28°C will result in higher densities of *Wolbachia*,  
**542** which will be required for future transinfection of *Haematobia* spp.

## **543** 5. CONCLUSION

**544** We have successfully developed a continuous cell line from *H. irritans* (HIE-18) and  
**545** identified Schneider's cell culture medium and 30°C incubation temperature as  
**546** optimal for growth. The density of *Wolbachia* (wMelPop, wMel, and wAlbB)  
**547** decreased in the HIE-18 cells within 36 hours of infection, associated with the  
**548** production of AMPs via the Imd immune pathway, but densities subsequently  
**549** recovered. Currently, HIE-18 cells stably infected with these three strains of  
**550** *Wolbachia* have been subcultured over 50 passages suggesting permissiveness of  
**551** the HIE-18 cells for growth of this bacterium. The *Wolbachia* described here,  
**552** adapted to and growing in high density in the *Haematobia* cell lines, will provide an

**553** important resource toward the development of novel control approaches for buffalo  
**554** flies and horn flies.

## **555** ACKNOWLEDGEMENTS

**556** We thank Dr. Pia Olafson (USDA/ARS, Kerrville, TX) and Prof. Roger Moon  
**557** (Entomology, Univ. MN) for making *H. irritans* eggs available for establishment of the  
**558** *Haematobia* cell line. We thank Prof. Scott O'Neill (Monash University, Melbourne)  
**559** and the Eliminate Dengue program for donation of the two *Wolbachia* strains wMel  
**560** and wMelPop used for this study. This project was funded by Meat and Livestock  
**561** Australia.

## **562** REFERENCES

- 563** 1. Zug R and Hammerstein P, Bad guys turned nice? A critical assessment of Wolbachia  
**564** mutualisms in arthropod hosts. *Biol Rev* 90: 89-111 (2015).
- 565** 2. Zug R and Hammerstein P, Still a Host of Hosts for Wolbachia: Analysis of Recent Data  
**566** Suggests That 40% of Terrestrial Arthropod Species Are Infected. *Plos One* 7: e38544 (2012).
- 567** 3. Weeks AR, Turelli M, Harcombe WR, Reynolds KT and Hoffmann AA, From parasite to  
**568** mutualist: rapid evolution of Wolbachia in natural populations of *Drosophila*. *PLoS Biol* 5:  
**569** e114 (2007).
- 570** 4. Hughes GL and Rasgon JL, Transinfection: a method to investigate *W* olbachia–host  
**571** interactions and control arthropod-borne disease. *Insect Mol Biol* 23: 141-151 (2014).
- 572** 5. Kageyama D and Traut W, Opposite sex–specific effects of Wolbachia and interference with  
**573** the sex determination of its host *Ostrinia scapularis*. *Proc Biol Sci* 271: 251-258 (2004).
- 574** 6. Hosokawa T, Koga R, Kikuchi Y, Meng X-Y and Fukatsu T, Wolbachia as a bacteriocyte-  
**575** associated nutritional mutualist. *P Natl Acad Sci USA* 107: 769-774 (2010).
- 576** 7. Dedeine F, Vavre F, Fleury F, Loppin B, Hochberg ME and Boulétreau M, Removing symbiotic  
**577** Wolbachia bacteria specifically inhibits oogenesis in a parasitic wasp. *P Natl Acad Sci USA*  
**578** 98: 6247-6252 (2001).
- 579** 8. Werren JH, Baldo L and Clark ME, Wolbachia: master manipulators of invertebrate biology.  
**580** *Nat Rev Microbiol* 6: 741-751 (2008).
- 581** 9. Pietri JE, DeBruhl H and Sullivan W, The rich somatic life of Wolbachia. *Microbiologyopen* 5:  
**582** 923-936 (2016).
- 583** 10. Evans O, Caragata EP, McMeniman CJ, Woolfit M, Green DC, Williams CR, et al., Increased  
**584** locomotor activity and metabolism of *Aedes aegypti* infected with a life-shortening strain of  
**585** Wolbachia pipientis. *J Exp Biol* 212: 1436-1441 (2009).
- 586** 11. Peng Y, Nielsen JE, Cunningham JP and McGraw EA, Wolbachia infection alters olfactory-  
**587** cued locomotion in *Drosophila* spp. *Appl Environ Microbiol* 74: 3943-3948 (2008).
- 588** 12. Min KT and Benzer S, Wolbachia, normally a symbiont of *Drosophila*, can be virulent, causing  
**589** degeneration and early death. *Proc Natl Acad Sci U S A* 94: 10792-10796 (1997).
- 590** 13. Taylor M and Hoerauf A, Wolbachia bacteria of filarial nematodes. *Parasitology Today* 15:  
**591** 437-442 (1999).



- 592** 14. Raychoudhury R, Baldo L, Oliveira DC and Werren JH, Modes of acquisition of Wolbachia:  
**593** horizontal transfer, hybrid introgression, and codivergence in the *Nasonia* species complex.  
**594** *Evolution* 63: 165-183 (2009).  
**595** 15. Caspi-Fluger A, Inbar M, Mozes-Daube N, Katzir N, Portnoy V, Belausov E, et al., Horizontal  
**596** transmission of the insect symbiont *Rickettsia* is plant-mediated. *Proc Biol Sci* 279: 1791-  
**597** 1796 (2012).  
**598** 16. Heath BD, Butcher RDJ, Whitfield WGF and Hubbard SF, Horizontal transfer of Wolbachia  
**599** between phylogenetically distant insect species by a naturally occurring mechanism. *Curr*  
**600** *Biol* 9: 313-313 (1999).  
**601** 17. Brown AN and Lloyd VK, Evidence for horizontal transfer of Wolbachia by a *Drosophila* mite.  
**602** *Exp Appl Acarol* 66: 301-311 (2015).  
**603** 18. Sintupachee S, Milne JR, Poonchaisri S, Baimai V and Kittayapong P, Closely related  
**604** Wolbachia strains within the pumpkin arthropod community and the potential for horizontal  
**605** transmission via the plant. *Microb Ecol* 51: 294-301 (2006).  
**606** 19. Herbert RI and McGraw EA, The nature of the immune response in novel Wolbachia-host  
**607** associations. *Symbiosis* 74: 225-236 (2018).  
**608** 20. Bian G, Joshi D, Dong Y, Lu P, Zhou G, Pan X, et al., Wolbachia invades *Anopheles stephensi*  
**609** populations and induces refractoriness to Plasmodium infection. *Science* 340: 748-751  
**610** (2013).  
**611** 21. McMeniman CJ, Lane AM, Fong AW, Voronin DA, Iturbe-Ormaetxe I, Yamada R, et al., Host  
**612** adaptation of a Wolbachia strain after long-term serial passage in mosquito cell lines. *Appl*  
**613** *Environ Microbiol* 74: 6963-6969 (2008).  
**614** 22. McMeniman CJ, Lane RV, Cass BN, Fong AWC, Sidhu M, Wang YF, et al., Stable Introduction  
**615** of a Life-Shortening Wolbachia Infection into the Mosquito *Aedes aegypti*. *Science* 323: 141-  
**616** 144 (2009).  
**617** 23. Woolfit M, Iturbe-Ormaetxe I, Brownlie JC, Walker T, Riegler M, Seleznev A, et al., Genomic  
**618** evolution of the pathogenic Wolbachia strain, w MelPop. *Genome Biol Evol* 5: 2189-2204  
**619** (2013).  
**620** 24. Rosales C and Vonnice S. Cellular and molecular mechanisms of insect immunity: Insect  
**621** Physiology and Ecology, ed. by Shields D. InTeach Publicaiton, Croatia, pp. 179-212 (2017).  
**622** 25. Wong ZS, Hedges LM, Brownlie JC and Johnson KN, Wolbachia-mediated antibacterial  
**623** protection and immune gene regulation in *Drosophila*. *PLoS One* 6: e25430 (2011).  
**624** 26. Tinoco-Nunes B, Telleria EL, da Silva-Neves M, Marques C, Azevedo-Brito DA, Pitaluga AN, et  
**625** al., The sandfly *Lutzomyia longipalpis* LL5 embryonic cell line has active Toll and Imd  
**626** pathways and shows immune responses to bacteria, yeast and Leishmania. *Parasite Vector*  
**627** 9: 222-233 (2016).  
**628** 27. Stokes BA, Yadav S, Shokal U, Smith LC and Eleftherianos I, Bacterial and fungal pattern  
**629** recognition receptors in homologous innate signaling pathways of insects and mammals.  
**630** *Front Microbiol* 6: 19-31 (2015).  
**631** 28. Bourtzis K, Pettigrew MM and O'Neill SL, Wolbachia neither induces nor suppresses  
**632** transcripts encoding antimicrobial peptides. *Insect Mol Biol* 9: 635-639 (2000).  
**633** 29. Bian G, Xu Y, Lu P, Xie Y and Xi Z, The endosymbiotic bacterium Wolbachia induces resistance  
**634** to dengue virus in *Aedes aegypti*. *PLoS Pathog* 6: e1000833 (2010).  
**635** 30. Pan X, Zhou G, Wu J, Bian G, Lu P, Raikhel AS, et al., Wolbachia induces reactive oxygen  
**636** species (ROS)-dependent activation of the Toll pathway to control dengue virus in the  
**637** mosquito *Aedes aegypti*. *Proc Natl Acad Sci U S A* 109: 23-31 (2012).  
**638** 31. Kambris Z, Cook PE, Phuc HK and Sinkins SP, Immune activation by life-shortening Wolbachia  
**639** and reduced filarial competence in mosquitoes. *Science* 326: 134-136 (2009).  
**640** 32. Rances E, Ye YH, Woolfit M, McGraw EA and O'Neill SL, The relative importance of innate  
**641** immune priming in Wolbachia-mediated dengue interference. *PLoS Pathog* 8: e1002548  
**642** (2012).

- 643** 33. Caragata EP, Rances E, Hedges LM, Gofton AW, Johnson KN, O'Neill SL, et al., Dietary  
**644** cholesterol modulates pathogen blocking by Wolbachia. *PLoS Pathog* 9: e1003459 (2013).  
**645** 34. da Silva Gonçalves D, Iturbe-Ormaetxe I, Martins-da-Silva A, Telleria EL, Rocha MN, Traub-  
**646** Csekö YM, et al., Wolbachia introduction into *Lutzomyia longipalpis* (Diptera: Psychodidae)  
**647** cell lines and its effects on immune-related gene expression and interaction with *Leishmania*  
**648** *infantum*. *Parasite Vector* 12: 33-46 (2019).  
**649** 35. Oyarzun MP, Quiroz A and Birkett MA, Insecticide resistance in the horn fly: alternative  
**650** control strategies. *Med Vet Entomol* 22: 188-202 (2008).  
**651** 36. Iwasa M and Ishiguro N, Genetic and morphological differences of *Haematobia irritans* and  
**652** *H. exigua*, and molecular phylogeny of Japanese Stomoxyini flies (Diptera, Muscidae). *Med*  
**653** *Entomol Zool* 61: 335-344 (2010).  
**654** 37. Lane J, Jubb T, Shephard R, Webb-Ware J and Fordyce G. Priority list of endemic diseases for  
**655** the red meat industries: Meat & Livestock Australia (Report) B.AHE.0010 (2015).  
**656** 38. Grisi L, Leite RC, Martins JR, Barros AT, Andreotti R, Cancado PH, et al., Reassessment of the  
**657** potential economic impact of cattle parasites in Brazil. *Rev Bras Parasitol Vet* 23: 150-156  
**658** (2014).  
**659** 39. Farnsworth WR, Collett MG and Ridley IS, Field survey of insecticide resistance in  
**660** *Haematobia irritans exigua* de Meijere (Diptera: Muscidae). *Aust J Entomol* 36: 257-261  
**661** (1997).  
**662** 40. Rothwell JT, Hackett KC, Friend M, Farnsworth WR and Lowe LB, Efficacy of zeta-  
**663** cypermethrin as pour-on or spray formulations for the control of buffalo fly (*Haematobia*  
**664** *irritans exigua*) in cattle. *Aust Vet J* 76: 610-612 (1998).  
**665** 41. Lohmeyer K and Kammlah D, Improved mass rearing techniques for the horn fly,  
**666** *Haematobia irritans* (L.)(Diptera: Muscidae). *Southwest Entomol* 31: 83-85 (2006).  
**667** 42. Goblirsch MJ, Spivak MS and Kurtti TJ, A cell line resource derived from honey bee (*Apis*  
**668** *mellifera*) embryonic tissues. *PLoS One* 8: e69831 (2013).  
**669** 43. Oliver JD, Burkhardt NY, Felsheim RF, Kurtti TJ and Munderloh UG, Motility characteristics  
**670** are altered for *Rickettsia bellii* transformed to overexpress a heterologous rickA gene. *Appl*  
**671** *Environ Microbiol* 80: 1170-1176 (2014).  
**672** 44. Munderloh UG and Kurtti TJ, Formulation of medium for tick cell culture. *Exp Appl Acarol* 7:  
**673** 219-229 (1989).  
**674** 45. Low VL, Tan TK, Lim PE, Domingues LN, Tay ST, Lim YAL, et al., Use of COI, CytB and ND5  
**675** genes for intra- and inter-specific differentiation of *Haematobia irritans* and *Haematobia*  
**676** *exigua*. *Vet Parasitol* 204: 439-442 (2014).  
**677** 46. Wiwatanaratanabutr S and Kittayapong P, Effects of temephos and temperature on  
**678** Wolbachia load and life history traits of *Aedes albopictus*. *Med Vet Entomol* 20: 300-307  
**679** (2006).  
**680** 47. Yeap HL, Axford JK, Popovici J, Endersby NM, Iturbe-Ormaetxe I, Ritchie SA, et al., Assessing  
**681** quality of life-shortening Wolbachia-infected *Aedes aegypti* mosquitoes in the field based on  
**682** capture rates and morphometric assessments. *Parasit Vectors* 7: 58-71 (2014).  
**683** 48. Schmittgen TD and Livak KJ, Analyzing real-time PCR data by the comparative C(T) method.  
**684** *Nat Protoc* 3: 1101-1108 (2008).  
**685** 49. Voronin D, Tran-Van V, Potier P and Mavingui P, Transinfection and growth discrepancy of  
**686** *Drosophila* Wolbachia strain wMel in cell lines of the mosquito *Aedes albopictus*. *J Appl*  
**687** *Microbiol* 108: 2133-2141 (2010).  
**688** 50. Fallon AM, Cytological properties of an *Aedes albopictus* mosquito cell line infected with  
**689** Wolbachia strain wAlbB. *In Vitro Cell Dev Biol Anim* 44: 154-161 (2008).  
**690** 51. Sakamoto JM and Azad AF, Propagation of arthropod-borne *Rickettsia* spp. in two mosquito  
**691** cell lines. *Appl Environ Microbiol* 73: 6637-6643 (2007).  
**692** 52. Hoffmann AA, Ross PA and Rasic G, Wolbachia strains for disease control: ecological and  
**693** evolutionary considerations. *Evol Appl* 8: 751-768 (2015).

- 694 53. Brooks MA and Kurtti TJ, Insect cell and tissue culture. *Annu Rev Entomol* 16: 27-52 (1971).  
695 54. Perotti MA, Lysyk TJ, Kalischuk-Tymensen LD, Yanke LJ and Selinger LB, Growth and survival  
696 of immature *Haematobia irritans* (Diptera : Muscidae) is influenced by bacteria isolated from  
697 cattle manure and conspecific larvae. *J Med Entomol* 38: 180-187 (2001).  
698 55. Hayflick L and Moorhead PS, The serial cultivation of human diploid cell strains. *Exp Cell Res*  
699 25: 585-621 (1961).  
700 56. Forneris NS, Otero G, Pereyra A, Repetto G, Rabossi A, Quesada-Allue LA, et al., High  
701 chromosomal variation in wild horn fly *Haematobia irritans* (Linnaeus) (Diptera, Muscidae)  
702 populations. *Comp Cytogenet* 9: 31-50 (2015).  
703 57. Lachance LE, Chromosome studies in three species of Diptera (Muscidae and  
704 Hypodermatidae). *Ann Entomol Soc Am* 57: 69-73 (1964).  
705 58. Avancini RM and Weinzierl RA, Karyotype of the horn fly, *Haematobia irritans* (L.)(Diptera,  
706 Muscidae). *Cytologia* 59: 269-272 (1994).  
707 59. Lynn DE, Development and characterization of insect cell lines. *Cytotechnology* 20: 3-11  
708 (1996).  
709 60. Schneider I, Differentiation of Larval *Drosophila* Eye-Antennal Discs in Vitro. *J Exp Zool* 156:  
710 91-103 (1964).  
711 61. van Oers MM and Lynn DE, Insect Cell Culture. In: *Encyclopedia of Life Sciences (ELS)*, John  
712 Wiley & Sons, Ltd: Chichester 2010).  
713 62. Snyder AK, McLain C and Rio RV, The tsetse fly obligate mutualist *Wigglesworthia morsitans*  
714 alters gene expression and population density via exogenous nutrient provisioning. *Appl*  
715 *Environ Microbiol* 78: 7792-7797 (2012).  
716 63. Snyder AK, Deberry JW, Runyen-Janecky L and Rio RV, Nutrient provisioning facilitates  
717 homeostasis between tsetse fly (Diptera: Glossinidae) symbionts. *Proceedings of the Royal*  
718 *Society B: Biological Sciences* 277: 2389-2397 (2010).  
719 64. Serbus LR, White PM, Silva JP, Rabe A, Teixeira L, Albertson R, et al., The Impact of Host Diet  
720 on *Wolbachia* Titer in *Drosophila*. *Plos Pathog* 11: e1004777 (2015).  
721 65. Thomas MB and Blanford S, Thermal biology in insect-parasite interactions. *Trends Ecol Evol*  
722 18: 344-350 (2003).  
723 66. Moghadam NN, Thorshauge PM, Kristensen TN, de Jonge N, Bahrndorff S, Kjeldal H, et al.,  
724 Strong responses of *Drosophila melanogaster* microbiota to developmental temperature. *Fly*  
725 (*Austin*) 12: 1-12 (2018).  
726 67. Clancy DJ and Hoffmann AA, Environmental effects on cytoplasmic incompatibility and  
727 bacterial load in *Wolbachia*-infected *Drosophila simulans*. *Entomol Exp Appl* 86: 13-24  
728 (1998).  
729 68. Ross PA, Wiwatanaratnabutr I, Axford JK, White VL, Endersby-Harshman NM and Hoffmann  
730 AA, *Wolbachia* Infections in *Aedes aegypti* Differ Markedly in Their Response to Cyclical Heat  
731 Stress. *Plos Pathog* 13: e1006006 (2017).  
732 69. Mouton L, Henri H, Bouletreau M and Vavre F, Effect of temperature on *Wolbachia* density  
733 and impact on cytoplasmic incompatibility. *Parasitology* 132: 49-56 (2006).  
734 70. Murdock CC, Blanford S, Hughes GL, Rasgon JL and Thomas MB, Temperature alters  
735 *Plasmodium* blocking by *Wolbachia*. *Sci Rep* 4: 3932-3936 (2014).

736  
737

**738** **Table. 1.** List of primers designed to study immune response to infection with  
**739** *Wolbachia* in *H. irritans*.

**740**

| <b>Gene</b> | <b>Primer (5'-3')</b>                                             | <b>Size (bp)</b> |
|-------------|-------------------------------------------------------------------|------------------|
| Relish      | 60_F_TGTCGAATAACCACTGGTGCCAGA<br>159_R_TCAATCGCCTGTTGACAAGGACA    | 100              |
| Cactus      | 461_F_AAGGAAGCAAGCCGAACATGACGA<br>560_R_AGTCTTGTGCGGAATGTCCCAGA   | 100              |
| Attacin     | 163_F_AGCTCCATGACCATTGGCATGAT<br>262_R_TGCCACAGCCTTCCATAGTCGT     | 100              |
| Cercopin    | 253_F_CGAATGCCCACTGATGTCACAACC<br>351_R_TCGCTGATCATCACCATAATGCTCA | 100              |
| Defensin    | 164_F_ACTTGTTGAGCGGTACTGGTGT<br>263_R_ACACAAACCGCTTTGGAGTTGCA     | 100              |
| GAPDH       | 378_F_CCGGTGGAGGCAGGAATGATGT<br>445_R_CCACCCAAAAGACCGTTGACG       | 88               |

**741**

**742**

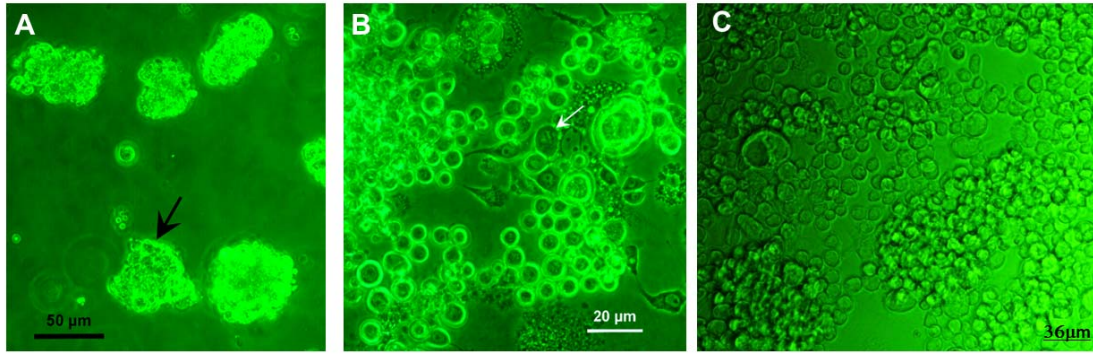

743

744 Fig. 1. Cellular morphology and features of *H. irritans* cell cultures. **A.**

745 Embryonic fragments seeded into primary cultures, one-day post-inoculation; arrow

746 indicates a cluster of 20-30 cells. **B.** Round cells predominate in young HIE18

747 cultures, third transfer, two months in culture. Arrow indicates a cell in metaphase. **C.**

748 Current continuous HIE-18 isolate cells (June 5, 2019) maintained in Schneider's

749 medium. The cells are predominantly round, 5 - 10  $\mu\text{m}$ , loosely adherent and form

750 multicellular clusters.

751

752

753

754

755

756

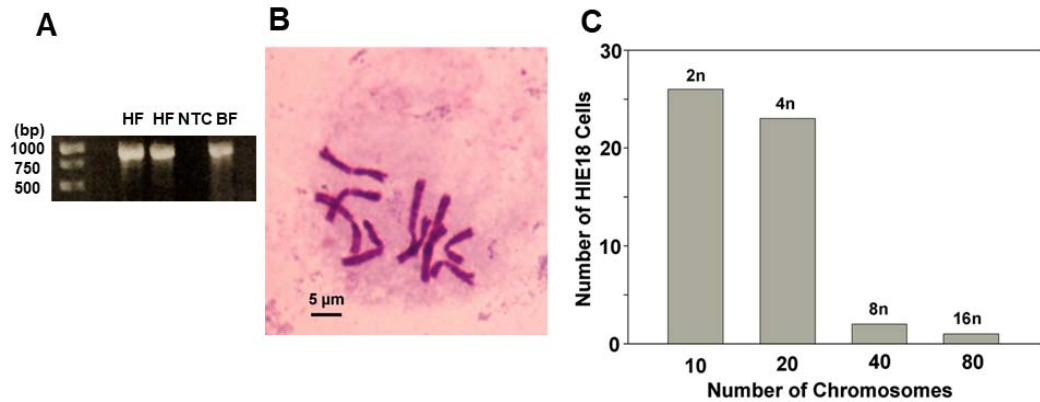

757

758 **Fig. 2. PCR and chromosome profile confirmation of HIE18.** **A.** Approximate 920-

759 bp product amplified using mitochondrial-encoded COI primer specific to

760 *Haematobia* spp. HF: *H. irritans* HIE-18 cell line, NTC: Negative control, BF: *H.*

761 *exigua*. **B.** Metaphase chromosome spread in Giemsa stained diploid HIE-18 cells.

762 **C.** Graph shows a number of metaphase chromosomes in *H. irritans* cells.

763

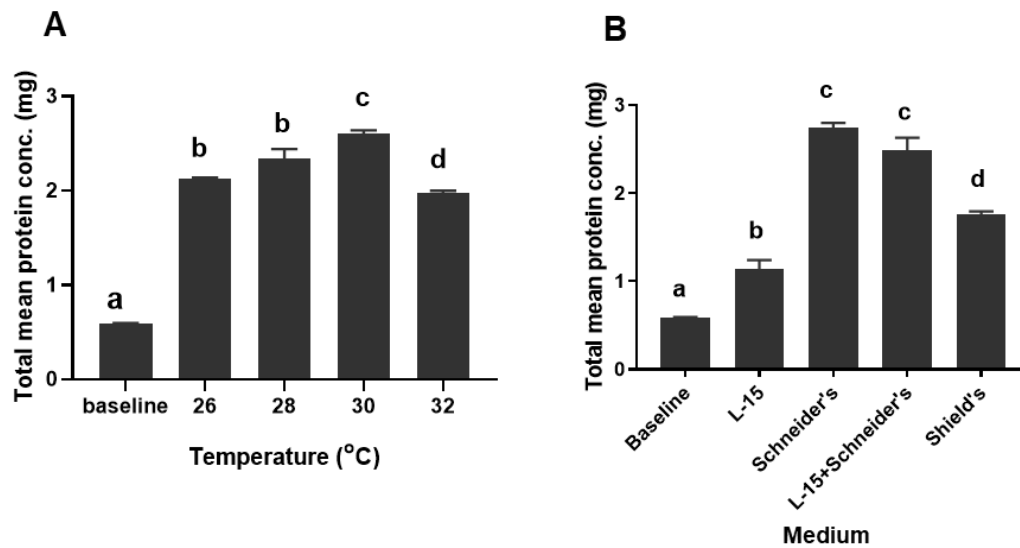

**764**

**765** Fig. 3. Protein production in HIE-18 cells grown in different temperatures and

**766** culturing mediums. Left axis shows protein concentration used as a proxy for the

**767** HIE-18 cellular growth, determined using a Bradford assay. Here, baseline data is

**768** protein production from the HIE-18 cells grown in modified L-15 medium for 24 hours

**769** at 30°C before assigning test temperature and test medium. **A.** Total protein

**770** production was significantly different between the cultures incubated at different

**771** temperatures ( $F_{4, 10} = 237.1, p < 0.0001$ ). **B.** Total protein production was significantly

**772** different between the cultures grown in different culturing media ( $F_{4, 10} = 118.3,$

**773**  $p < 0.0001$ ). Error bars are SEM calculated from three replicates of culture flasks.

**774** Columns with different letters are significantly different (Tukey's multiple comparison

**775** test;  $p = 0.05$ ).

**776**

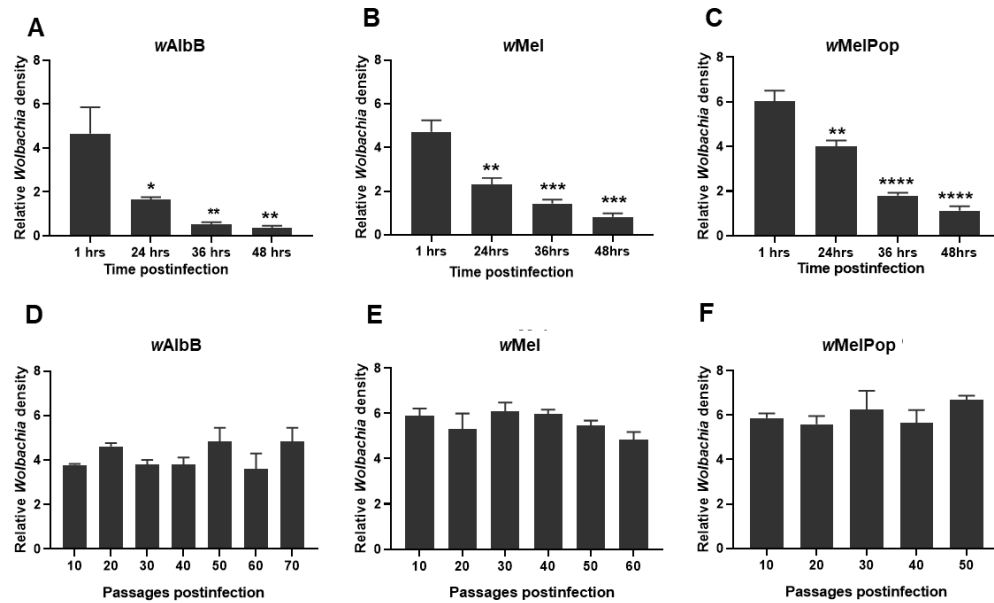

**777**

**778** Fig. 4. Quantification of *Wolbachia* (*wsp*) relative to host (*GAPDH*) using real-  
**779** time PCR in HIE-18 cell post-infection. (A-C). Significant decreases in wAlbB,  
**780** wMel and wMelPop were observed within 48 hours post-infection. Bars with  
**781** asterisks represent significant difference compared to one hour post-infection using  
**782** Dunn's test; \* $p < 0.02$ , \*\* $p < 0.003$ , \*\*\* $p < 0.0003$ , \*\*\*\* $p < 0.0001$ . D. wAlbB dynamics in  
**783** HIE-18 cell line over 70 passages. E. wMel dynamics in HIE-18 cell line over 60  
**784** passages. F. wMelPop strain dynamics in HIE-18 cell line over 50 passages. Tukey's  
**785** test ( $p = 0.05$ ) showed no significant variation in *Wolbachia* infection over passages  
**786** (D-E). Error bars indicate SEM from triplicate culturing flasks.

**787**



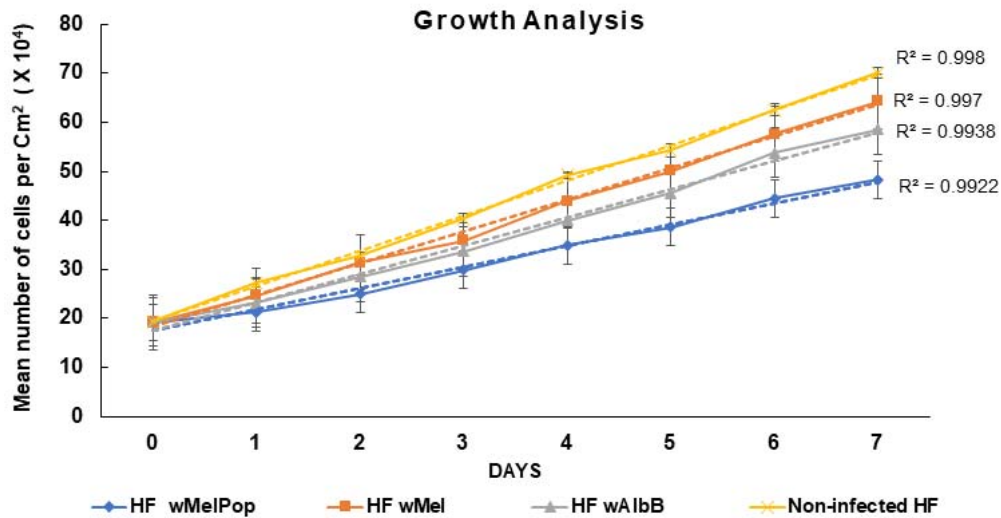

**788**

**789** Fig. 5. *In vitro* proliferation of the non-infected and differentially *Wolbachia*

**790** infected HIE-18 cell lines. Cells infected with *Wolbachia* (*wAlbB*, *wMel*, and

**791** *wMelPop*) proliferated slowly, resulting in increased doubling time. Horizontal axis

**792** represents the mean number of cells per  $\text{cm}^2$  area + SD of three replicate culturing

**793** flasks.

**794**

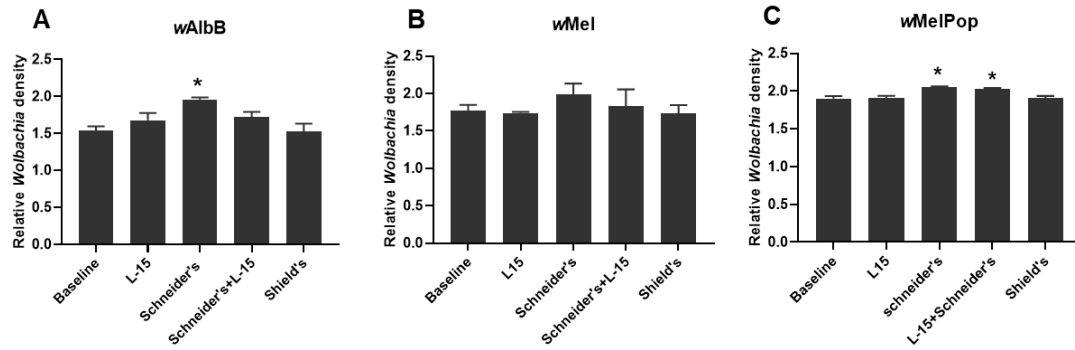

**795**

**796** Fig. 6. *Wolbachia* density in HIE-18 cells grown in different media. *Wolbachia*

**797** density was calculated relative to host *GAPDH* after growing infected HIE-18 cells in

**798** test medium for seven days. Here, baseline is *Wolbachia* density in HIE-18 cells

**799** grown in modified L-15 medium for 24 hours before assigning the test medium. **A.**

**800** wAlbB infected HIE-18 cell line. **B.** wMel infected HIE-18 cell line. **C.** wMelPop

**801** infected HIE-18 cell line. Error bars are SEM calculated from three replicates of

**802** culturing flasks. Asterisks represent significance compared to baseline growth using

**803** Tukey's test ( $p < 0.05$ ).

**804**

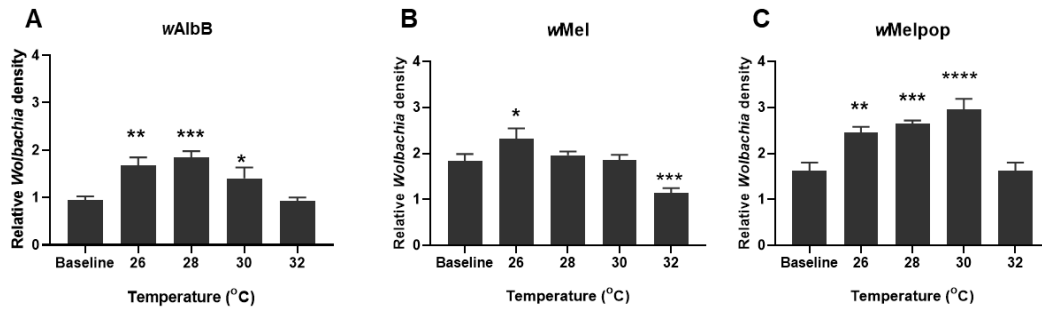

**805**

**806** Fig. 7. *Wolbachia* density in HIE-18 cells incubated at different temperatures.

**807** *Wolbachia* density is calculated relative to host GAPDH after growing infected HIE-

**808** 18 cells at test temperatures for seven days. Here, baseline data is *Wolbachia*

**809** density in HIE-18 cells grown in modified L-15 medium for 24 hours at 30°C before

**810** assigning test temperature. **A.** wAlbB-infected HIE-18 cell line. **B.** wMel-infected HIE-

**811** 18 cell line. **C.** wMelPop-infected HIE-18 cell line. Error bars are SEM calculated

**812** from three replicate culturing flasks. Asterisks represent significance compared to

**813** baseline using Tukey's test (\* $p < 0.03$ , \*\* $p < 0.005$ , \*\*\* $p < 0.001$ , \*\*\*\* $p < 0.0001$ ).

**814**

815

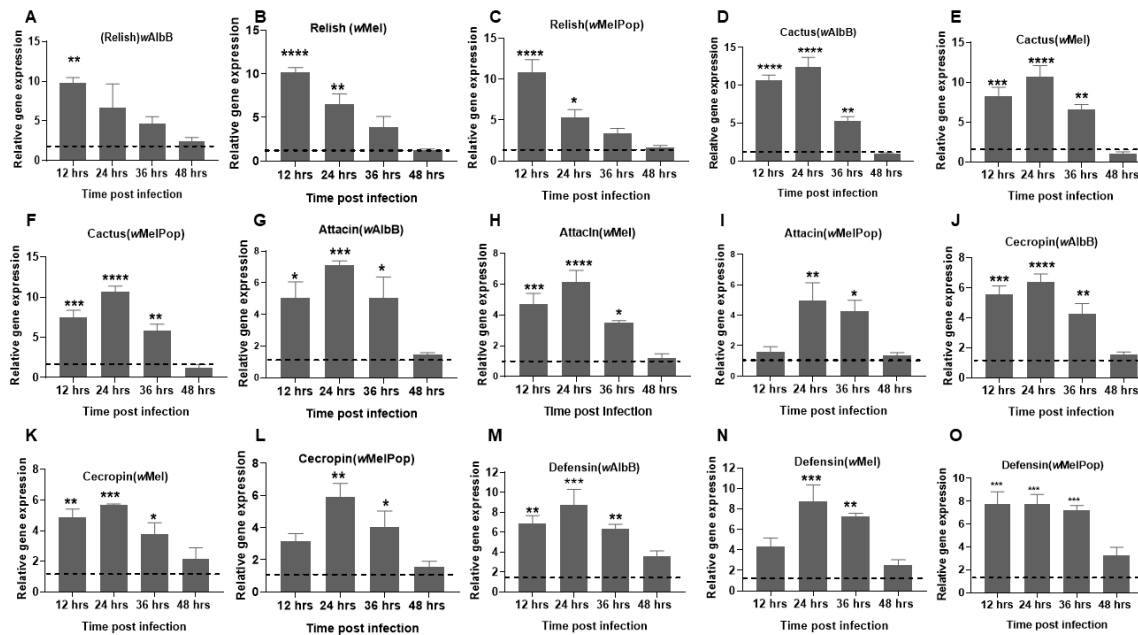

816

817 Fig. 8. Relative gene expression of the immune pathways IMD, Toll, and AMPs  
 818 in *H. irritans* determined by real-time PCR within 48 hours of infection with  
 819 *Wolbachia* (wAlbB, wMel, wMelPop). (A-C) Relative gene expression of *relish*, a  
 820 regulator of the Imd pathways. (D-F) Relative expression of the *cactus* gene  
 821 regulator of the Toll pathway. Relative gene expression of AMPs (G-I) *attacin* (J-L)  
 822 *cecropin* (M-O) *defensin*. Error bar is SEM calculated from three independent  
 823 experimental replicates. Quantification was normalised to the housekeeping gene  
 824 *GAPDH*, and the dotted line here represents the relative gene expression of the non-  
 825 infected control. Asterisks represent significance compared to control using a  
 826 Tukey's test (\* $p < 0.03$ , \*\* $p < 0.005$ , \*\*\* $p < 0.001$ , \*\*\*\* $p < 0.0001$ ).
